# Supplementary material for: Implications of Decreased Expression of miR-125a with Respect to Its Variant Allele in the Pathogenesis of Recurrent Pregnancy Loss: A Study in a High Incidence Zone
Source: MDPI journal article supplement (doi:10.3390/jcm11133834), 2022-07-01
Supplement: s1 [file s1]

**Table S1:** Demographic features of the subjects enrolled in the study (Recurrent Pregnancy Losses)

| Demographic Features  | Cases<br>n=200 (%) | Controls<br>n= 240 (%) | p value                 |
|-----------------------|--------------------|------------------------|-------------------------|
| <b>Age</b>            |                    |                        |                         |
| < 30                  | 112 (56)           | 125 (52.1)             | Reference (Ref)<br>0.25 |
| ≥ 30                  | 88 (44)            | 115 (47.9)             |                         |
| <b>Miscarriages</b>   |                    |                        |                         |
| <3                    | 79 (39.5)          | -                      |                         |
| ≥ 3                   | 121 (60.5)         |                        |                         |
| <b>Consanguinity</b>  |                    |                        |                         |
| Yes                   | 70 (35)            | 41 (17)                | Ref<br><0.05            |
| No                    | 130 (65)           | 199 (83)               |                         |
| <b>Family History</b> |                    |                        |                         |
| Yes                   | 39 (19.5)          | 13 (5.4)               | Ref<br><0.05            |
| No                    | 161 (80.5)         | 227 (94.6)             |                         |
| <b>TORCH</b>          |                    |                        |                         |
| Positive              | 4 (2.6)            | 0                      |                         |
| Negative              | 148 (97.3)         | 240 (100)              |                         |
| <b>APLA</b>           |                    |                        |                         |
| Positive              | 2 (2.5)            | 0                      |                         |
| Negative              | 77 (97.5)          | 240 (100)              |                         |
| <b>VDRL</b>           |                    |                        |                         |
| Positive              | 0                  | 0                      |                         |
| Negative              | 152 (100)          | 240 (100)              |                         |
| <b>USG Findings</b>   |                    |                        |                         |
| Normal                | 101(78.3)          | 188 (98.4)             |                         |
| Abnormal              | 28 (21.7)          | 3 (1.57)               |                         |

Ref, Reference

**Table S2:** The primers, polymerase chain reaction (PCR) conditions and a restriction enzyme used in this study

| Primer Pairs                             |                                                             | PCR conditions                                                                            | Restriction Enzymes |
|------------------------------------------|-------------------------------------------------------------|-------------------------------------------------------------------------------------------|---------------------|
| <b>PCR-RFLP<br/>rs12976445<br/>C/T</b>   | 5'-TTTTGGTCTTTCTGTCTCTGG -3'<br>5'-TGGAGGAAGGGTATGAGGAGT-3' | 95°C for 5 min (94°C for 30 s, 58°C for 30 s,<br>72°C for 30 s) × 35 cycles72°C for 7 min | <b>BaeGI</b>        |
| <b>Sequencing<br/>rs12976445<br/>C/T</b> | 5'-TTTTGGTCTTTCTGTCTCTGG -3'<br>5'-TGGAGGAAGGGTATGAGGAGT-3' | 95°C for 5 min (94°C for 30 s, 58°C for 30 s,<br>72°C for 30 s) × 35 cycles72°C for 7 min | -                   |
| <b>PCR-RFLP<br/>rs10404453<br/>A/G</b>   | 5'-CTGACTCCCTCTTATTCTGG-3'<br>5'-TAGAGACTGGCAACATGG-3'      | 95°C for 5 min (94°C for 30 s, 55°C for 30 s,<br>72°C for 30 s) × 35 cycles72°C for 7 min | <b>MspI</b>         |
| <b>miR-125a</b>                          | F-5'GGTGTCCCTGAGACCCCTTTAA-3'<br>R-5' GTGCAGGGTCCGAGGT      |                                                                                           |                     |

|             |                                                            |
|-------------|------------------------------------------------------------|
| <b>RNU6</b> | F-5' GCTTCGGCAGCACATATACTAAAAT<br>R-5'AACGCTTCACGAATTTGCGT |
|-------------|------------------------------------------------------------|

**Table S3:** Multivariate analysis of demographic characteristics, rs 12976445 genotypes and miR-125a expression in Recurrent Miscarriage patients

| Parameter      | Hazard (B) | 95% CI     | <i>p</i> Value |
|----------------|------------|------------|----------------|
| Age            | 1.260      | 0.78- 2.13 | 0.308          |
| Family History | 1.471      | 0.80- 3.20 | 0.183          |
| Consanguinity  | 0.198      | 0.46-1.45  | 0.500          |
| rs12976445 CT  | 1.266      | 0.14- 3.99 | 0.197          |
| rs12976445 CC  | 1.788      | 0.39- 4.61 | 0.037          |
| miR-125a       | 2.786      | 0.84- 5.33 | 0.008          |

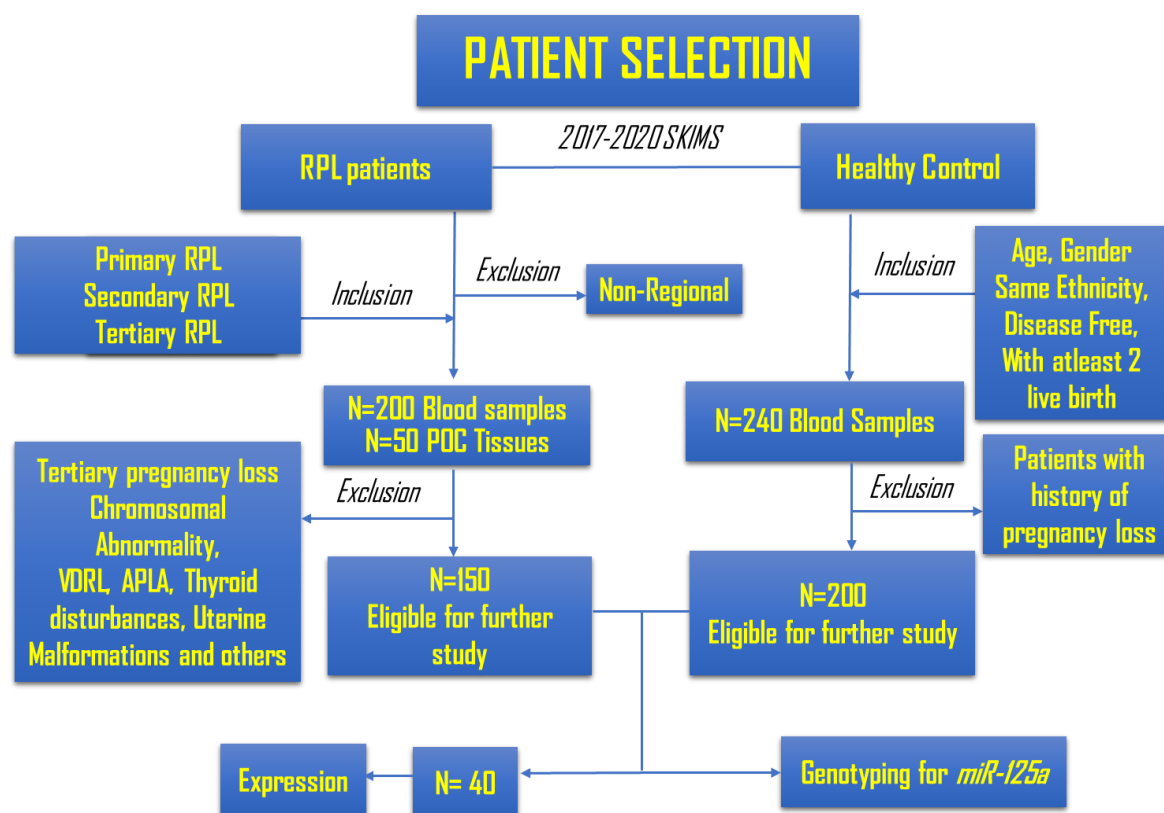

**Figure S1:** Path map showing the selection of patient with recurrent pregnancy loss and control group.

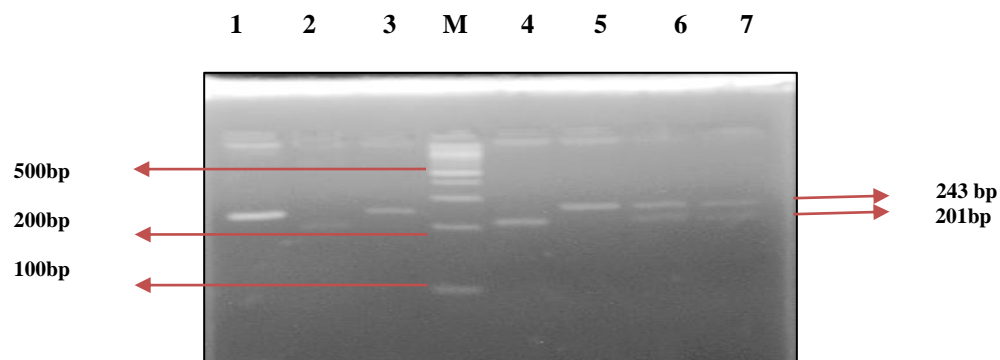

**Figure S2 (a):** RFLP picture of *miR-125a* rs 12976445 C/T after restriction digestion with *BaeGI* (3%) agarose gel electrophoresis  
 Lane M: 100bp marker, Lane 2,4 : homozygous variant CC genotype  
 Lane 1,3,5: homozygous wild TT genotype  
 Lane 6,7 : heterozygous CT genotype

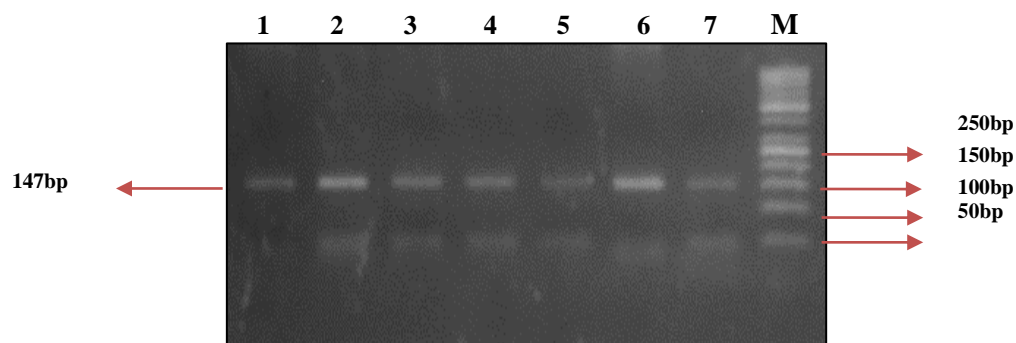

**Figure S2 (b):** RFLP picture of *miR-125a* 10404453 A/G after restriction digestion with *MspI* (3%) agarose gel electrophoresis  
 Lane M: 50bp marker, Lane1-7 : homozygous CC genotype
